# Supplementary material for: Purified IgG from aquaporin-4 neuromyelitis optica spectrum disorder patients alters blood-brain barrier permeability
Source: PubMed Central journal article supplement (PMC7470361; doi:10.1371/journal.pone.0238301), 2020-09-03

## RAW WESTERN BLOTS

-“X” is not shown in the original figure of the manuscript since some experiments such as isolated brain microvessels were performed in duplicate.

-Chemoluminescence detection for western blotting was performed with a commercial kit (Immobilon Western Chemiluminescent HRP Substrate WBKLS0500 Millipore Merck KGaA Darmstadt Germany).

-Band density was evaluated using Image J software.

### Figure 3.a.

- **Claudin-5** and **actin** expression in cultures of isolated brain microvessels treated with NMO-IgG<sub>1</sub>, Control-IgG and non-treated. The example is depicted in figure 3.a.

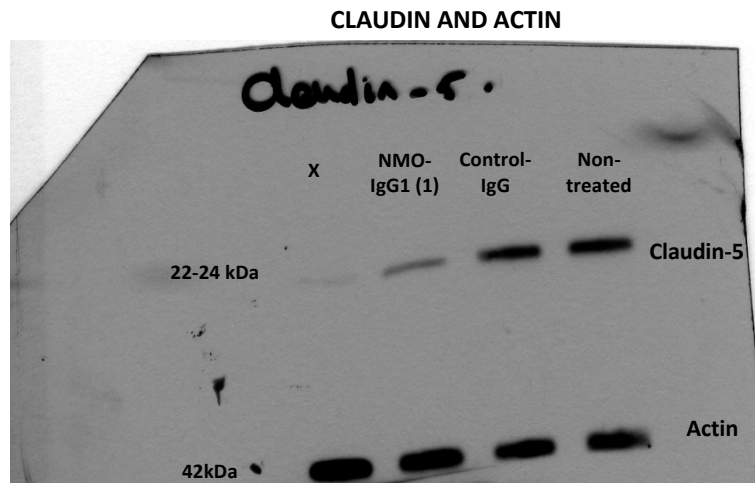

-Occludin (up) and actin (down) expression in cultures of isolated brain microvessels treated with NMO-IgG<sub>1</sub>, Control-IgG and non-treated. The example is depicted in figure 3.a.

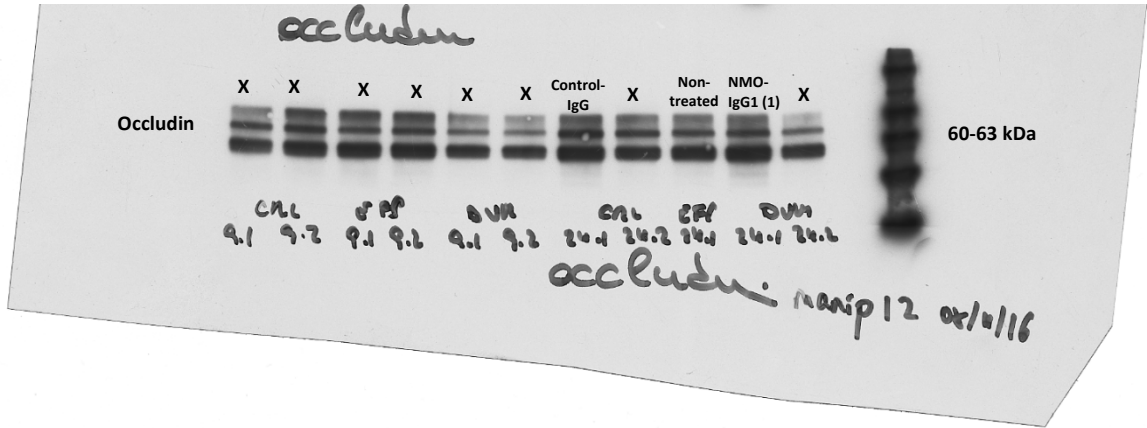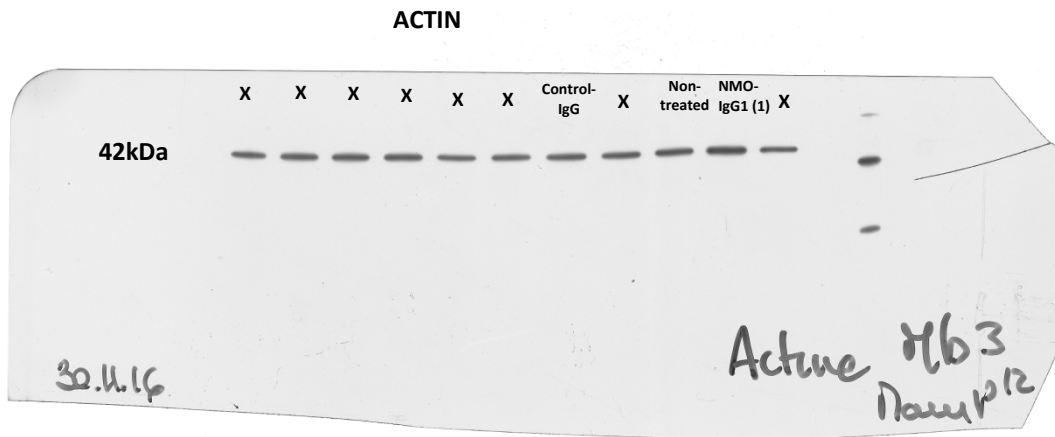

**-ZO-1 (up) and actin (down)** expression in cultures of isolated brain microvessels treated with NMO-IgG<sub>1</sub>, Control-IgG and non-treated. The example is depicted in figure 3.a.

**ZO-1**

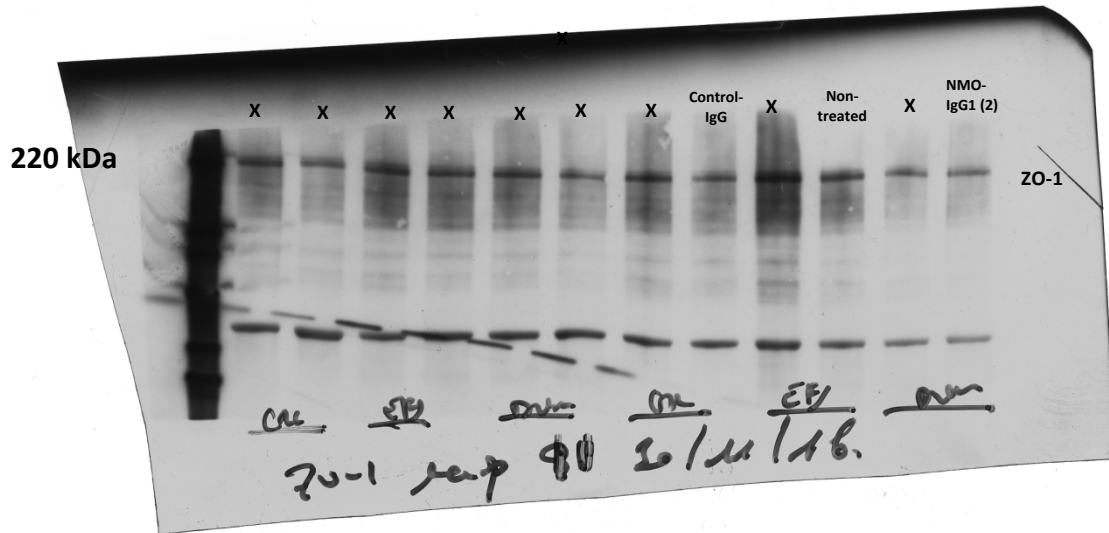

**ACTINE**

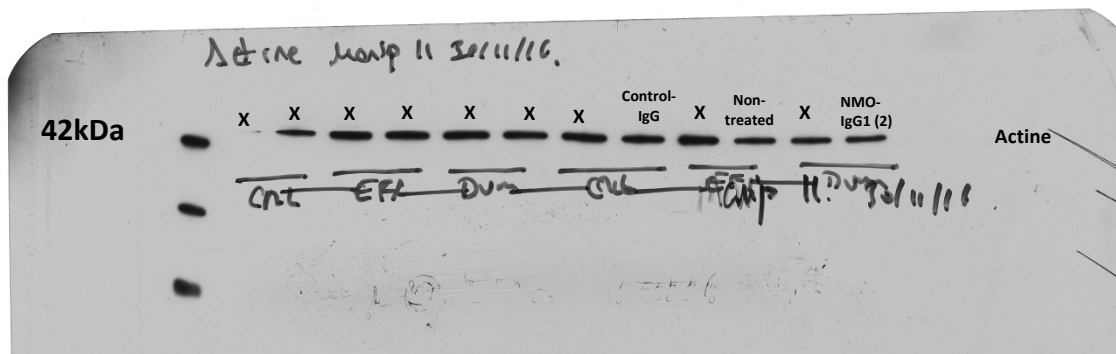

**Figure 3.b**

-**Actin** expression in cultures of endothelial cells treated with NMO-IgG<sub>1-6</sub>, Control-IgG and non-treated. The example is depicted in figure 3.b.

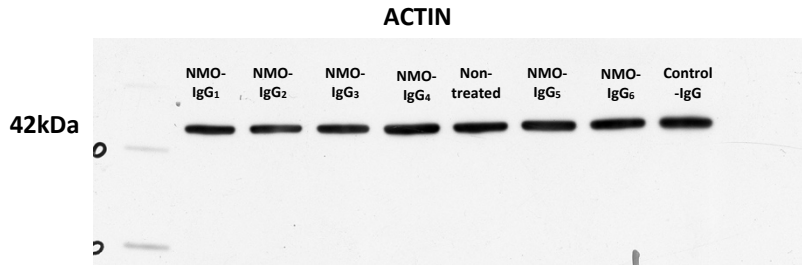

- **Claudin-5** expression in cultures of endothelial cells treated with NMO-IgG<sub>1-6</sub>, Control-IgG and non-treated. The example is depicted in figure 3.b.

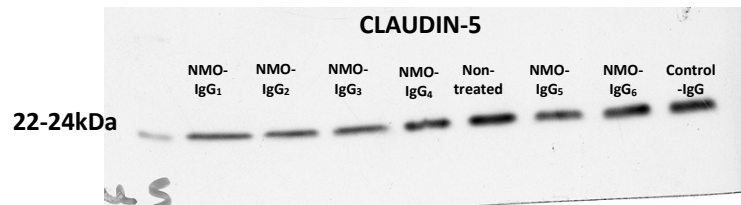

- **Occludin** expression in cultures of endothelial cells treated with NMO-IgG<sub>1-6</sub>, Control-IgG and non-treated. The example is depicted in figure 3.b.

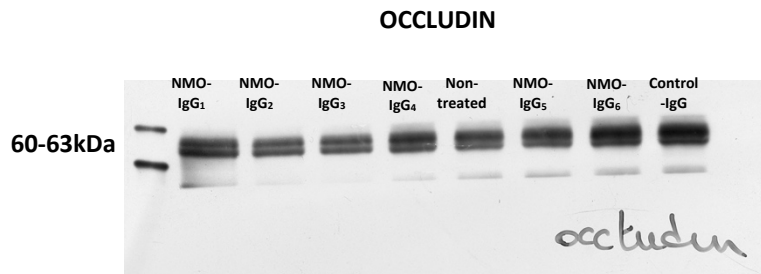

- **ZO-1** expression in cultures of endothelial cells treated with NMO-IgG<sub>1-6</sub>, Control-IgG and non-treated. The example is depicted in figure 3.b.

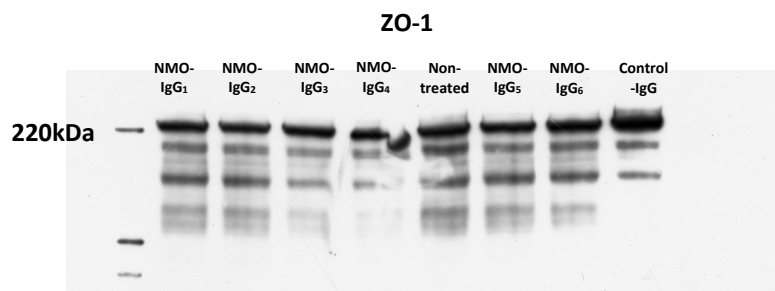

**Figure 5.**

**-Rat IgG** in periventricular regions from NMO-rat ( label as 10,12,13,16) and Control-rat (14,17,18,21,25,26). The non-perfused rat (positive control) is labelled as 0. Heavy and light chains signals are located at 50 and 30 kDa of molecular weight

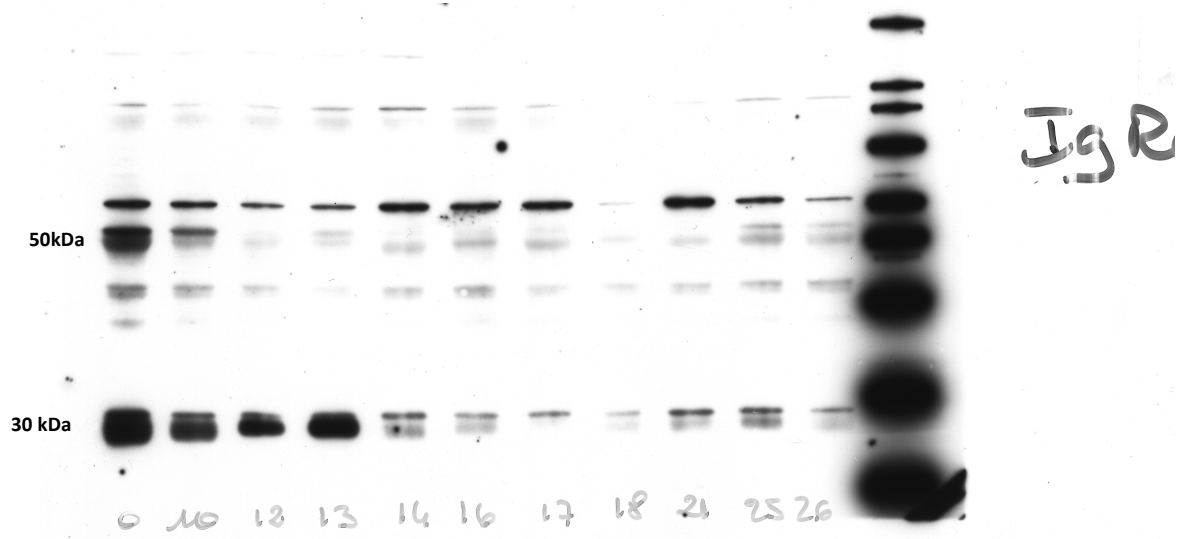

**Actin** corresponding to actin of figure 5 NMO-rat and Control-rat. Actin from NMO-rat (label as 10,12,13,16) and Control-rat (14,17,18,21,25,26). The non-perfused rat (positive control) is labelled as 0.

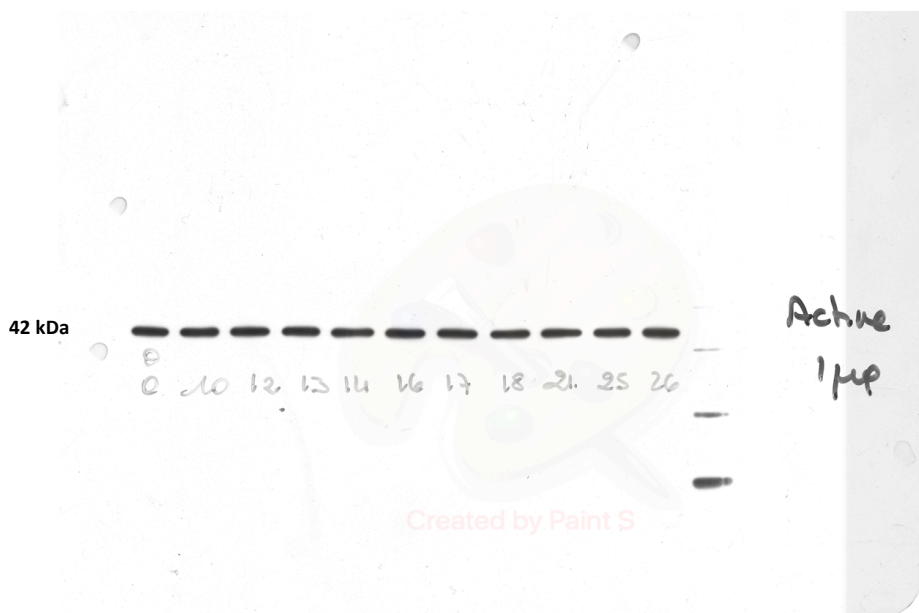

Supplement: pone.0238301.s001.pdf [file pone.0238301.s001.pdf]
