# Supplementary material for: Purified IgG from aquaporin-4 neuromyelitis optica spectrum disorder patients alters blood-brain barrier permeability
Source: PubMed Central journal article supplement (PMC7470361; doi:10.1371/journal.pone.0238301), 2020-09-03

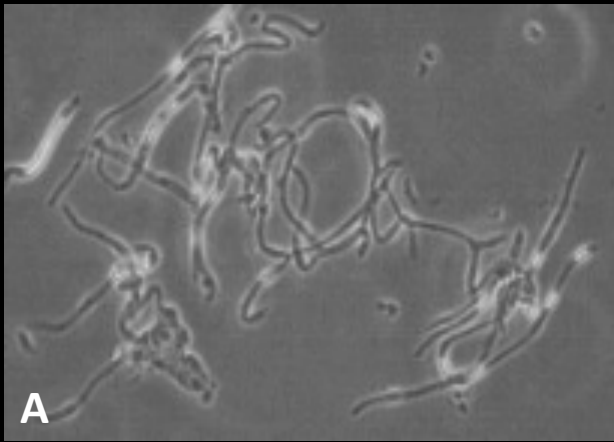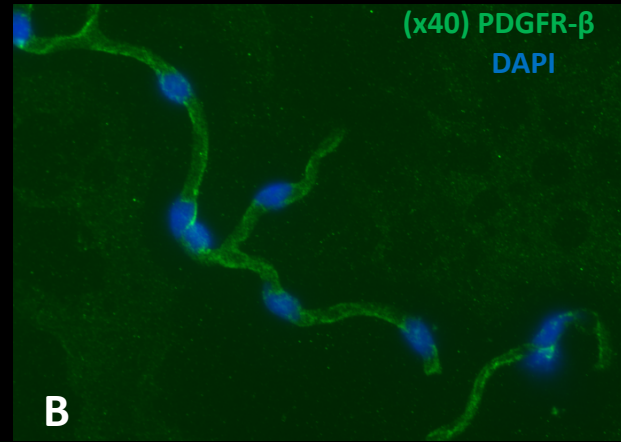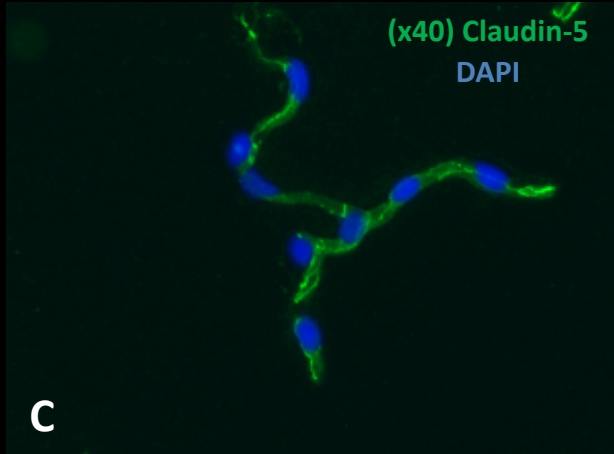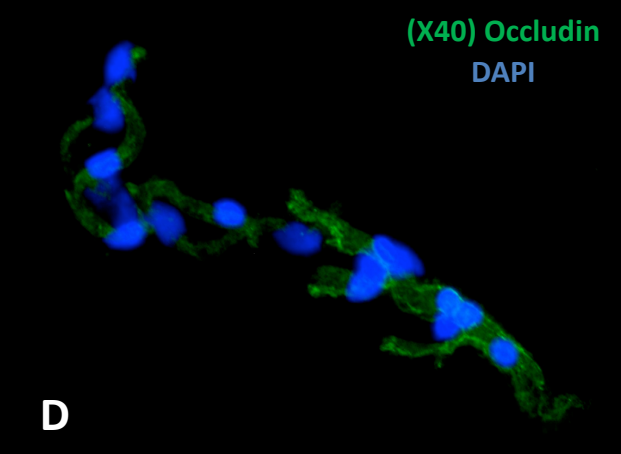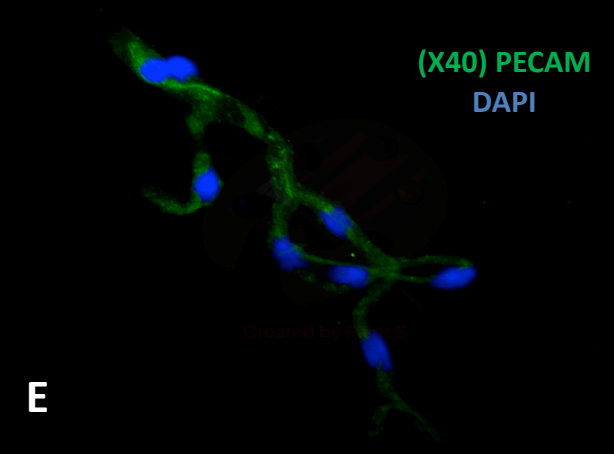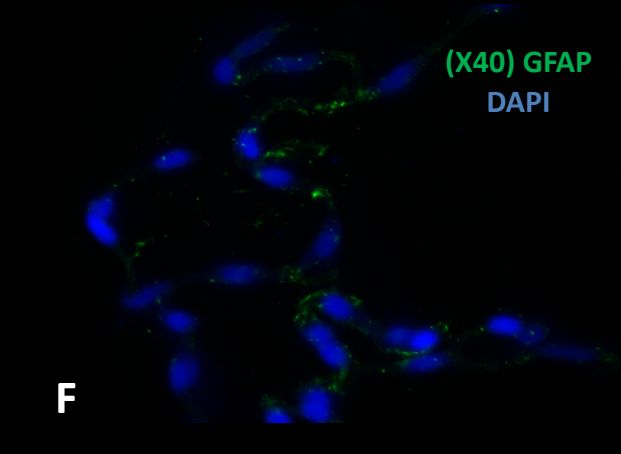

Supplement: pone.0238301.s002.pdf [file pone.0238301.s002.pdf]
